# Supplementary material for: Ion mobility mass spectrometry workflows for characterizing bioactive isomer conformation, isomerization and drug–protein–liposome interaction
Source: Royal Society of Chemistry journal article supplement (doi:10.1039/c8ay01397g), 2018-01-01
Supplement: c8ay01397g1.pdf [file c8ay01397g1.pdf]

## Supplementary material

# Ion mobility mass spectrometry workflows for characterizing bioactive isomer conformation, isomerization and drug- protein-liposome interaction

Hui Ouyang <sup>1#</sup>, Tao Bo <sup>2#</sup>, Zhengxiang Zhang <sup>2</sup>, Xinqiu Guo <sup>3</sup>, Mingzhen He <sup>1</sup>, Junmao Li <sup>1</sup>, Shilin Yang <sup>1,4</sup>, Xin Ma <sup>2\*</sup>, Yulin Feng <sup>1,4\*</sup>

1. Jiangxi University of Traditional Chinese Medicine, No. 818 Yunwan Road, Nanchang 330002, P.R. China

2. Agilent Technologies, No. 3, Wang Jing Bei Lu, Beijing 100102, P.R. China

3. Ming De Tian Sheng Biotech Inc., Changping Campus of Peking University, 102200, Beijing, P.R. China

4. State Key Laboratory of Innovative Drug and Efficient Energy-Saving Pharmaceutical Equipment, No. 56 Yangming Road, Nanchang 330006, P.R. China

# These authors contributed equally to this article.

(A) 3-CQA

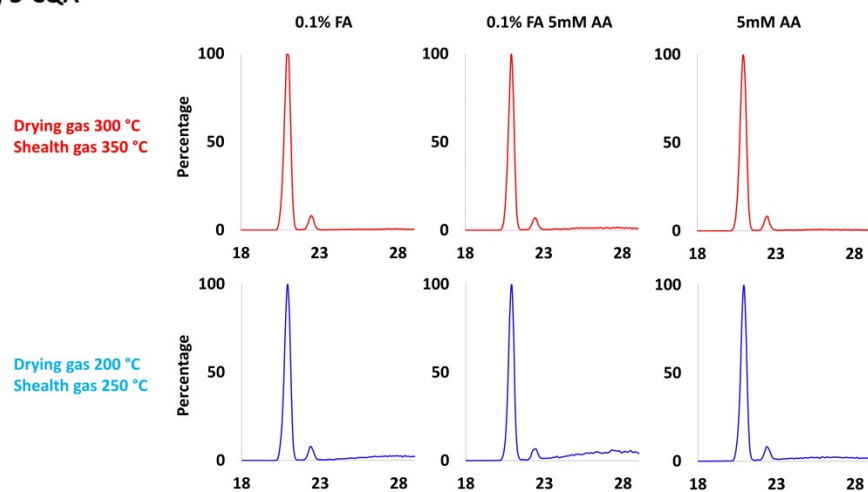

(B) 4-CQA

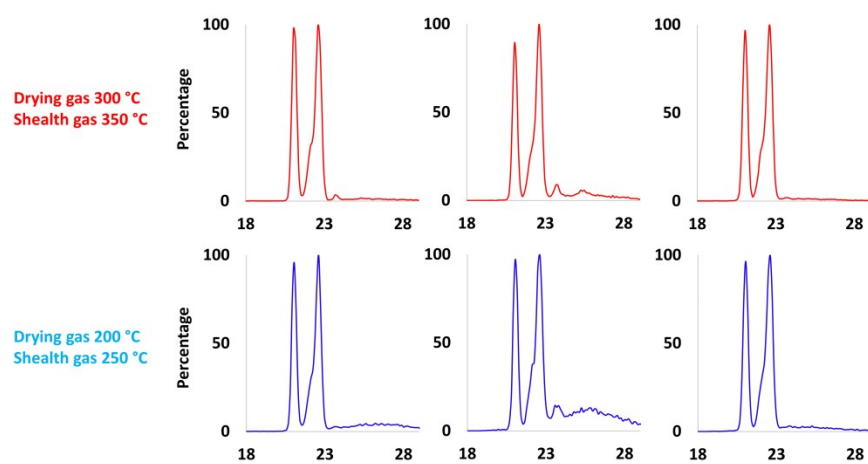

(C) 5-CQA

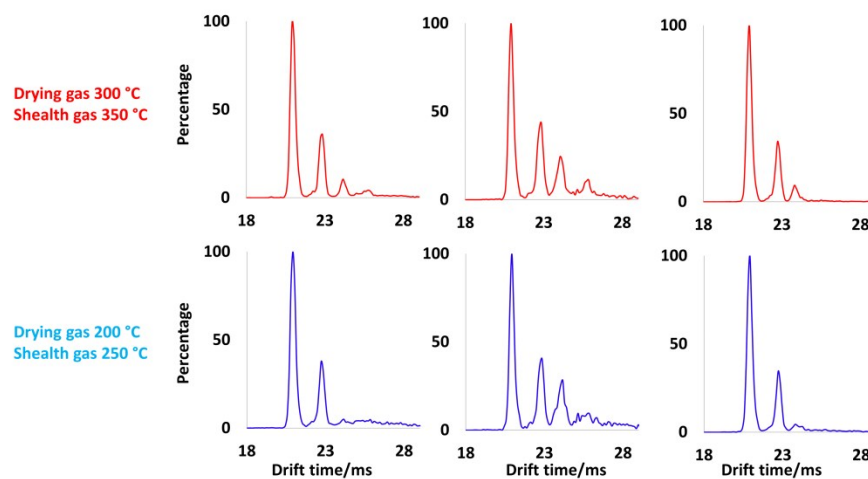

**Fig. S1.** The DT profile of 3-CQA (A), 4-CQA (B) and 5-CQA (C) at different ion source temperatures (drying gas and sheath gas temperature) and buffer systems.

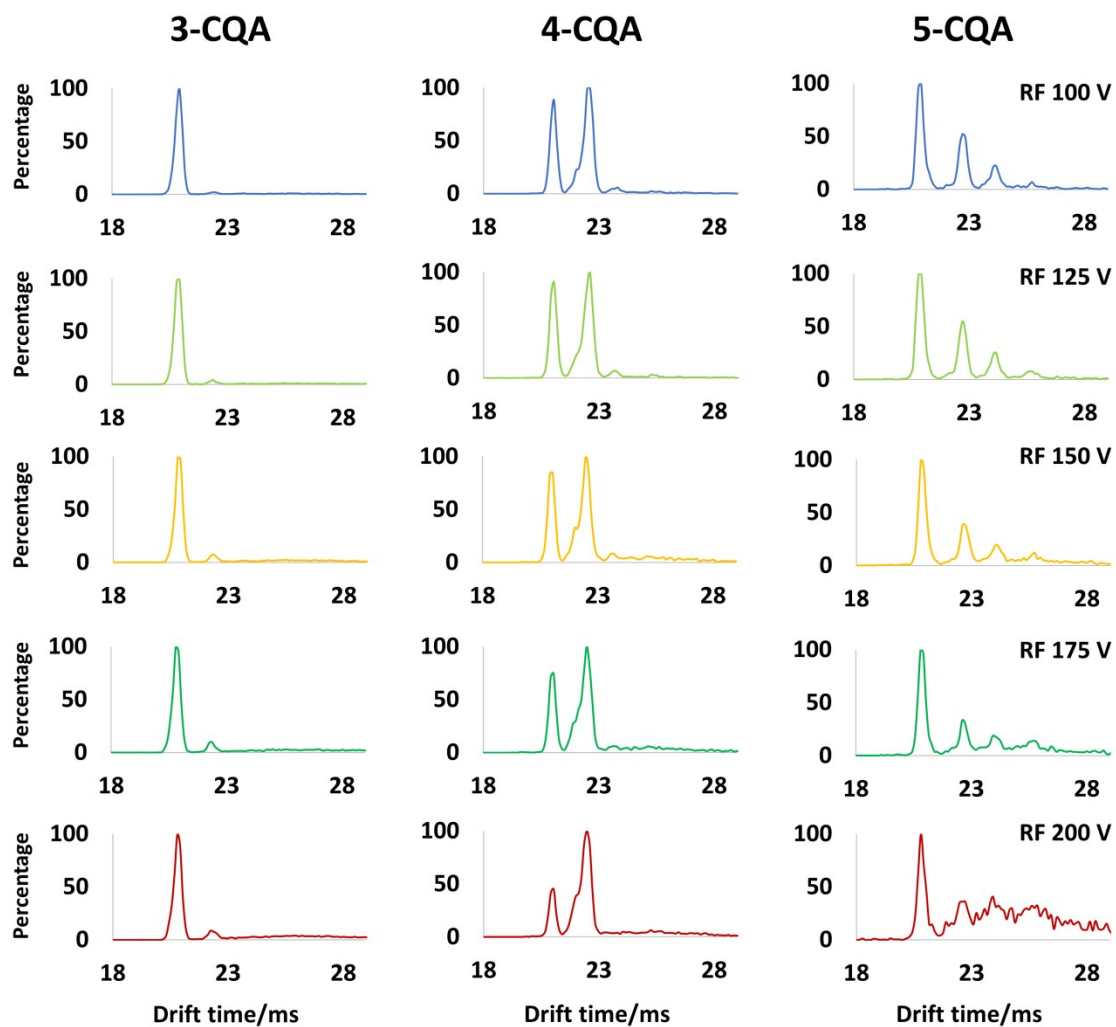

**Fig. S2.** IM DT profile of 3-CQA, 4-CQA and 5-CQA at different RF voltages.

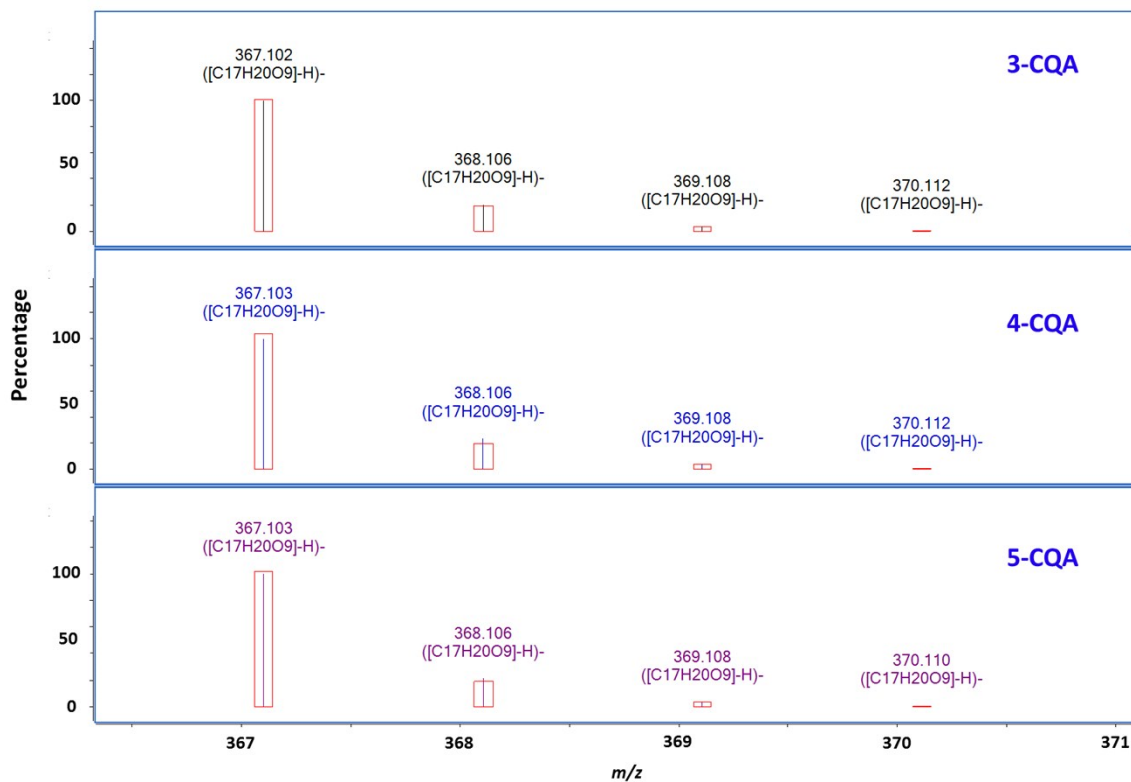

**Fig. S3.** The mass spectra of methylated CQA (C<sub>17</sub>H<sub>20</sub>O<sub>9</sub>) observed in the CQA standards. The mass spectra fitted well with the red squares, which indicated the theoretical accurate mass and isotopic distribution of C<sub>17</sub>H<sub>20</sub>O<sub>9</sub>.

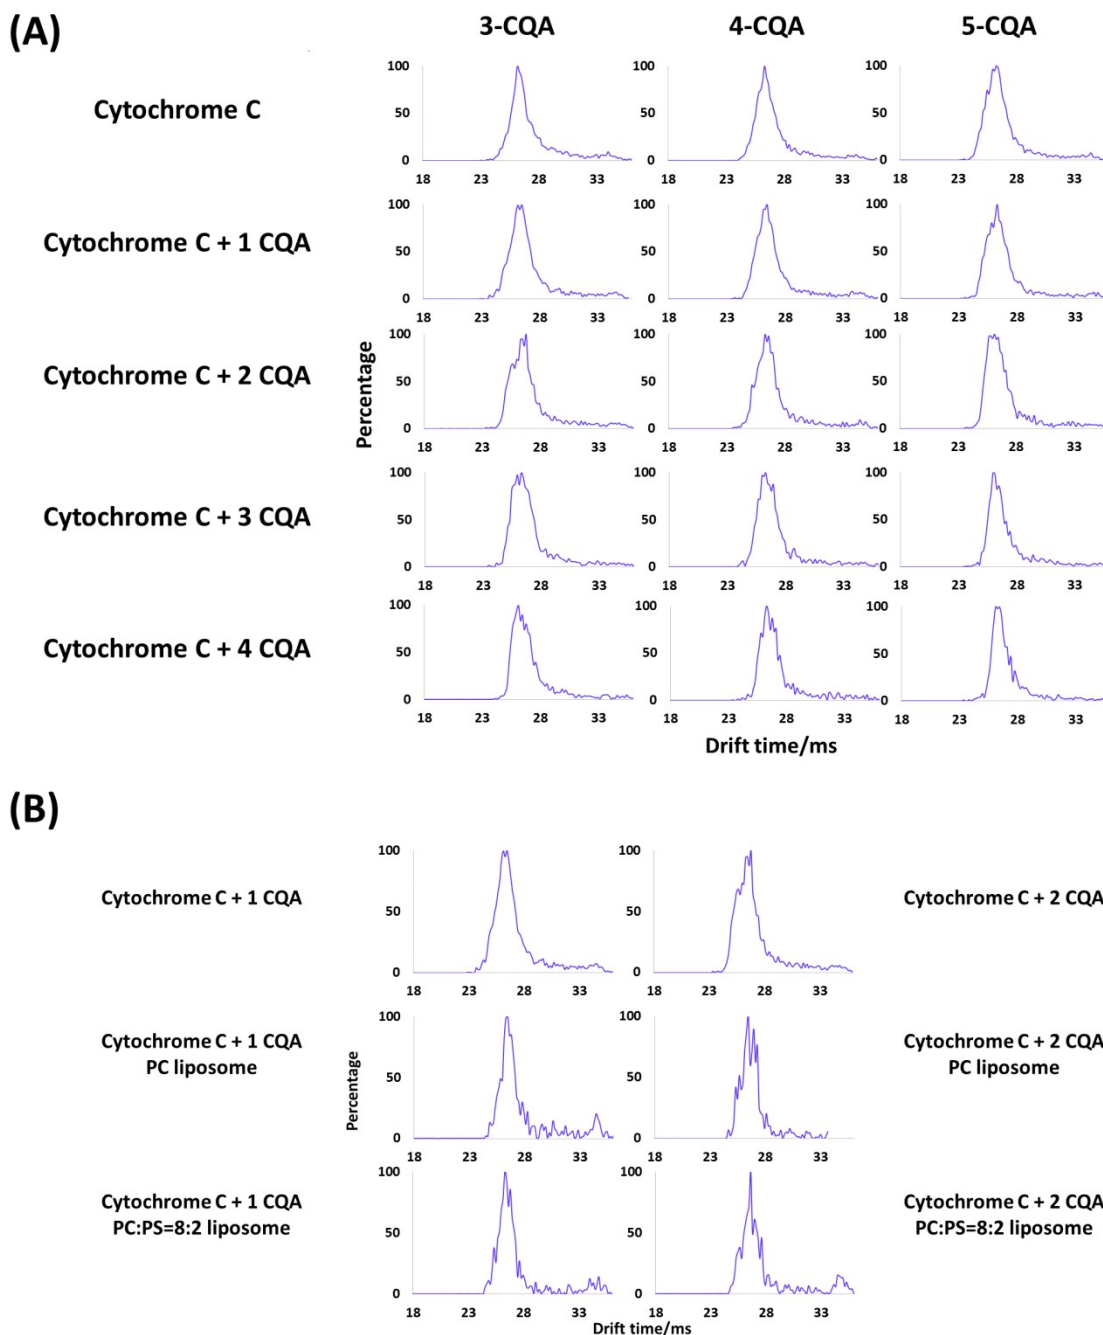

**Fig. S4.** (A) The DT distribution of +8-charge state of Cytochrome C and various CQA binding Cytochrome C. No significant DT difference is observed for the species. (B) The DT distribution of +8-charge state of one and two CQA binding Cytochrome C without liposome and with two different liposomes. No significant DT difference is observed for the species.
